# Supplementary material for: CLCA1 Regulates Airway Mucus Production and Ion Secretion Through TMEM16A
Source: MDPI journal article supplement (doi:10.3390/ijms22105133), 2021-05-12
Supplement: s1 [file s1]

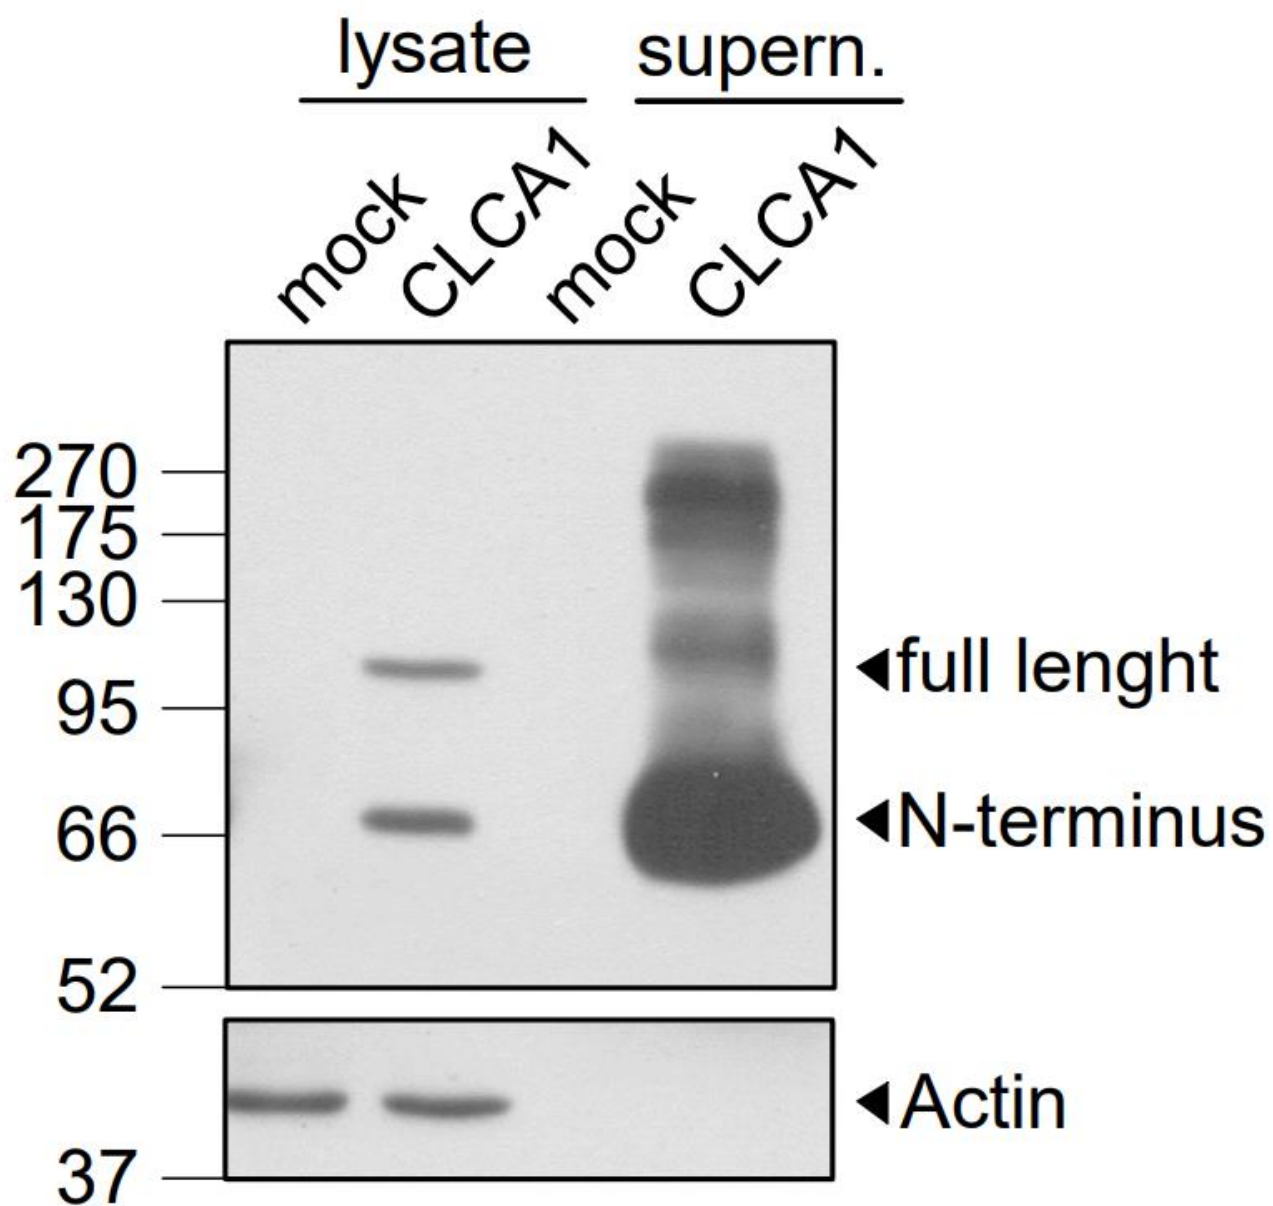

**Figure S1.** CLCA1 produced in HEK293 cells. Cells were transfected with human CLCA1 plasmid and secreted CLCA1 was harvested in the supernatant. Western blot of full length CLCA1 and secreted CLCA1-N terminus (N-CLCA1) harvested in the supernatant.

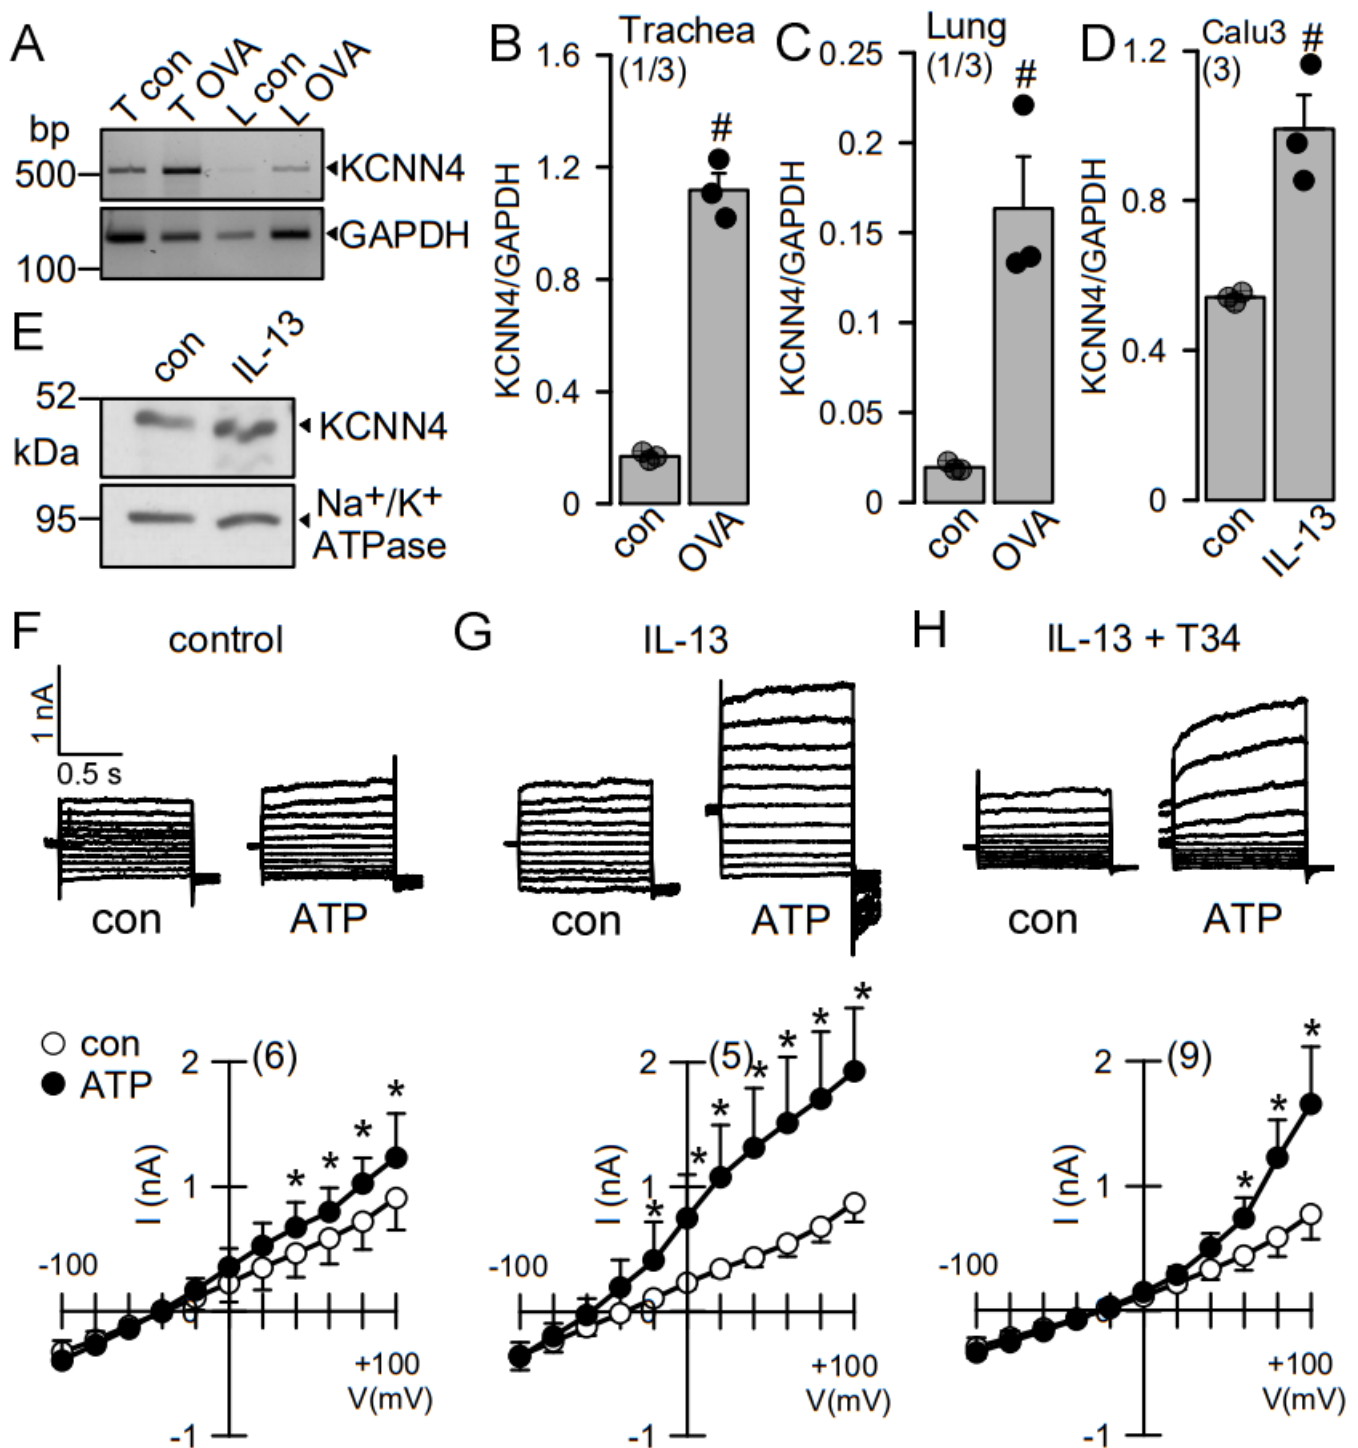

**Figure S2.** Upregulation of KCNN4 channels in asthma. (A–C) Original blot and summary for sqRT-PCR indicating upregulation of expression of the Ca<sup>2+</sup>-activated K<sup>+</sup> channel KCNN4 in trachea (T) and lungs (L) of OVA-treated asthmatic mice. (D) Summary of sqRT-PCR indicating upregulation of expression of KCNN4 in Calu3 airway epithelial cells after incubation with IL-13 (20 ng/mL). (E) Western blot of KCNN4 expressed in Calu3 cells suggesting slight upregulation by IL-13. (F–H) Whole cell patch clamp overlay currents and current/voltage relationships in Calu3 cells under control conditions, in the presence of IL-13, and in the presence of IL-13 and the KCNN4 blocker TRAM-34 (T34, 100 nM). ATP (100 μM) activated a whole cell current and hyperpolarized the membrane voltage in cells exposed to IL-13, suggesting predominant activation of KCNN4. In the presence of TRAM-34, whole cell currents were still activated but the membrane voltage remained depolarized. Application of ATP in the presence of the KCNN4-inhibitor Tram-34 depolarized the membrane voltage, indicating predominant activation of TMEM16A. Mean ± SEM (number of experiments). \* indicates significant difference when compared to the absence of OVA or IL-13 ( $p < 0.05$ ; unpaired t-test). \* indicates significant activation by ATP ( $p < 0.05$ ; paired t-test).

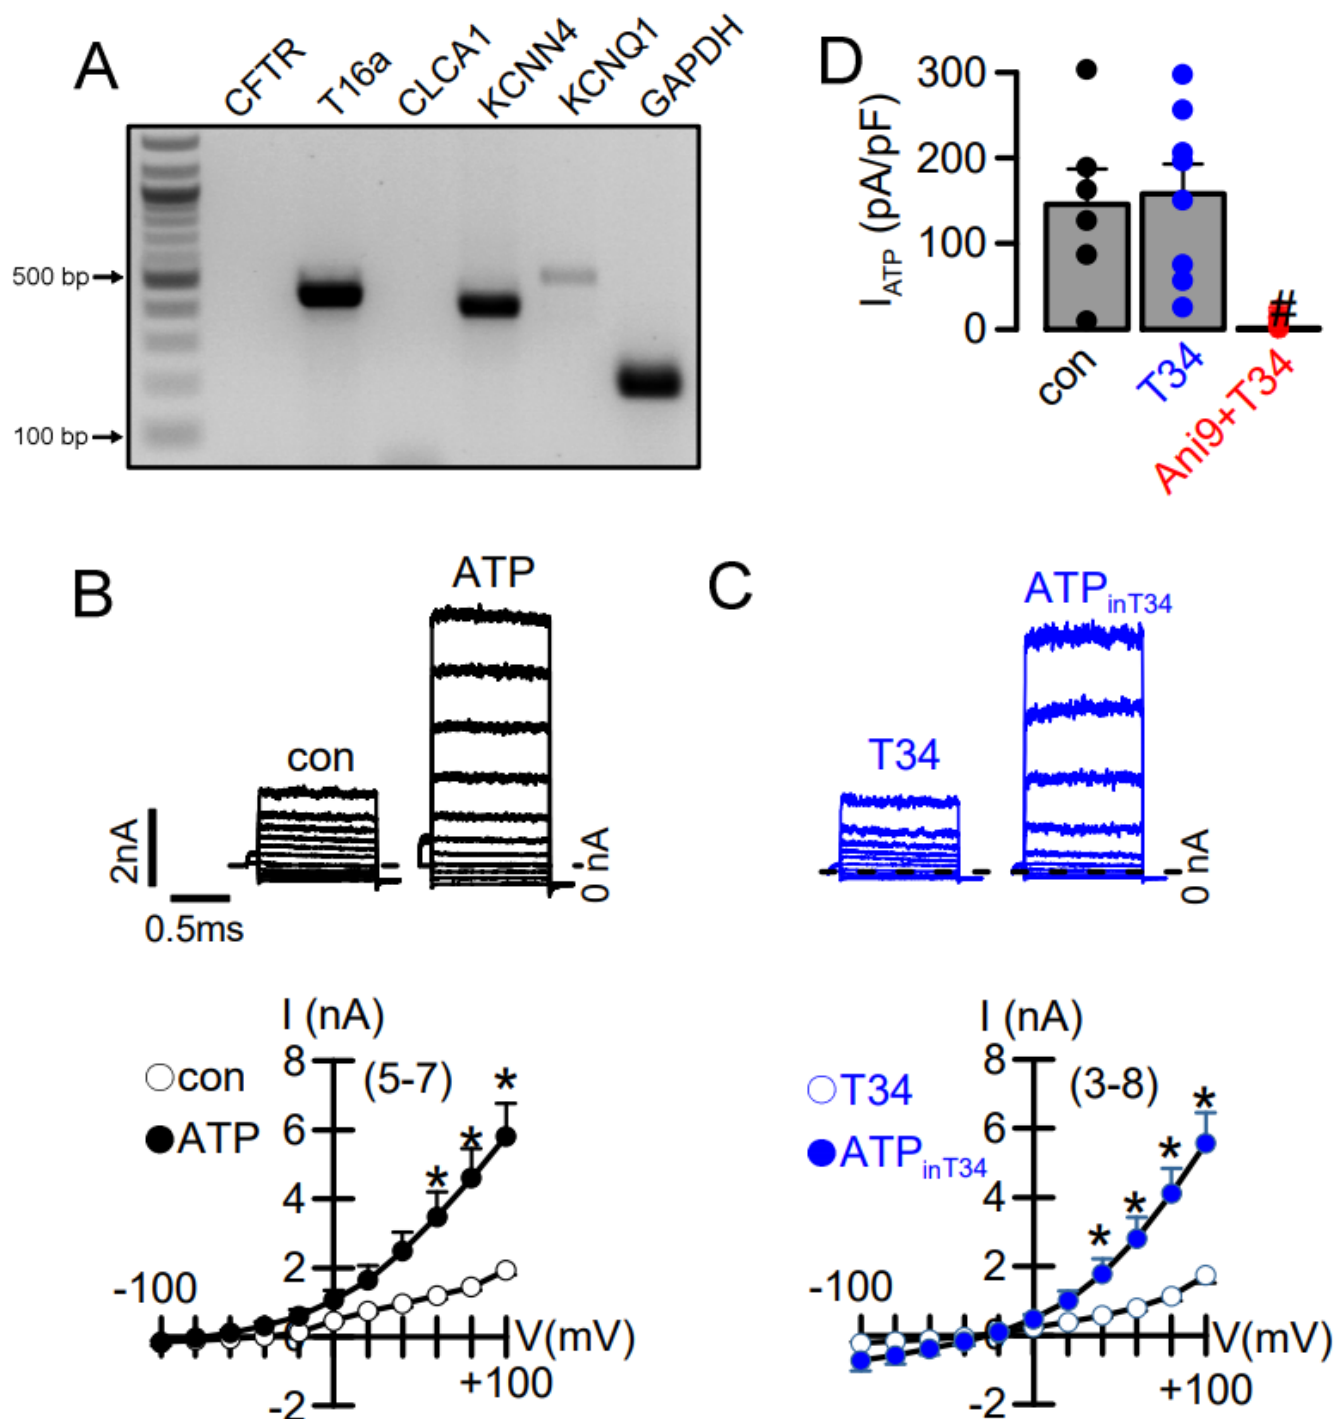

**Figure S3.** Activation of TMEM16A and KCNN4 in 6CFSMEo- human submucosal glands. (A) RT-PCR indicating pronounced expression of  $Ca^{2+}$ -dependent TMEM16A and KCNN4, with little or no expression of CFTR, CLCA1, or KCNQ1. (B,C) Whole cell currents and current/voltage relationships activated by ATP (1  $\mu$ M) in the absence or presence of the KCNN4-inhibitor Tram-34 (T34; 100 nM). In the absence of T34, cells were hyperpolarized by ATP, suggesting predominant activation of KCNN4  $K^+$  channels. In the presence of Tram-34, KCNN4 was blocked and ATP depolarized the cells by activation of TMEM16A. D) Summary of ATP-activated whole cell currents in the absence or presence of inhibitors. Mean  $\pm$  SEM (number of experiments). # indicates significant difference ( $p < 0.05$ ; unpaired t-test). \* indicates significant activation by ATP ( $p < 0.05$ ; paired t-test).

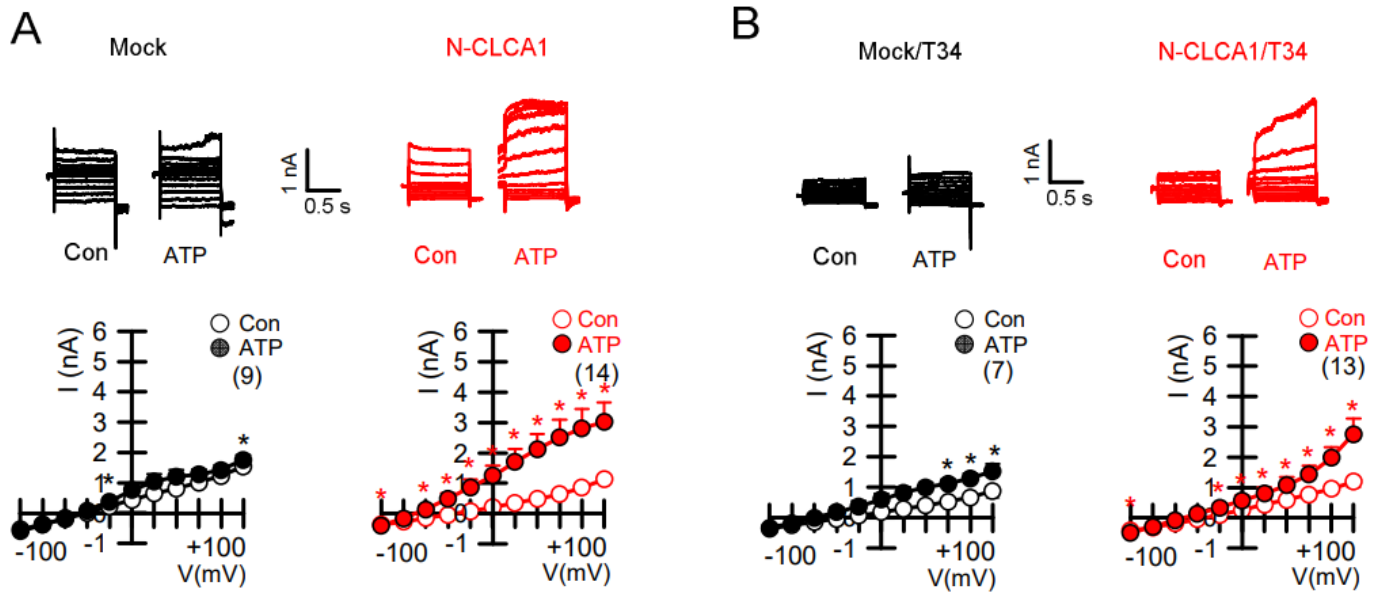

**Figure S4.** Activation of whole cell currents by N-CLCA1. Whole cell currents and current/voltage relationships in Calu3 cells under control conditions and after exposure to CLCA1 N-terminus (N-CLCA1) in the absence (**A**) or presence (**B**) of the KCNN4-inhibitor TRAM-34 (T34; 100 nM). ATP (100  $\mu$ M) activated a whole cell current and hyperpolarized the membrane voltage after incubation of the cells with N-CLCA1, suggesting predominant activation of KCNN4  $K^+$  channels. In the presence of TRAM-34, KCNN4 currents were inhibited and ATP no longer hyperpolarized the cells. In the presence of TRAM-34, I/V relationships were more outwardly rectifying and peak currents at +100 mV were similar as in the absence of TRAM-34. The data indicate that upon increase in intracellular  $Ca^{2+}$ , Calu3 cells activate predominantly KCNN4  $K^+$  currents. Mean  $\pm$  SEM (number of experiments). \*indicates significant activation by ATP ( $p < 0.05$ ; paired t-test).
